# Supplementary material
Source: PubMed Central journal article supplement (PMC3822375)
Supplement: Supp_Fig1.pdf [file Supp_Fig1.pdf]

## Supplementary Data

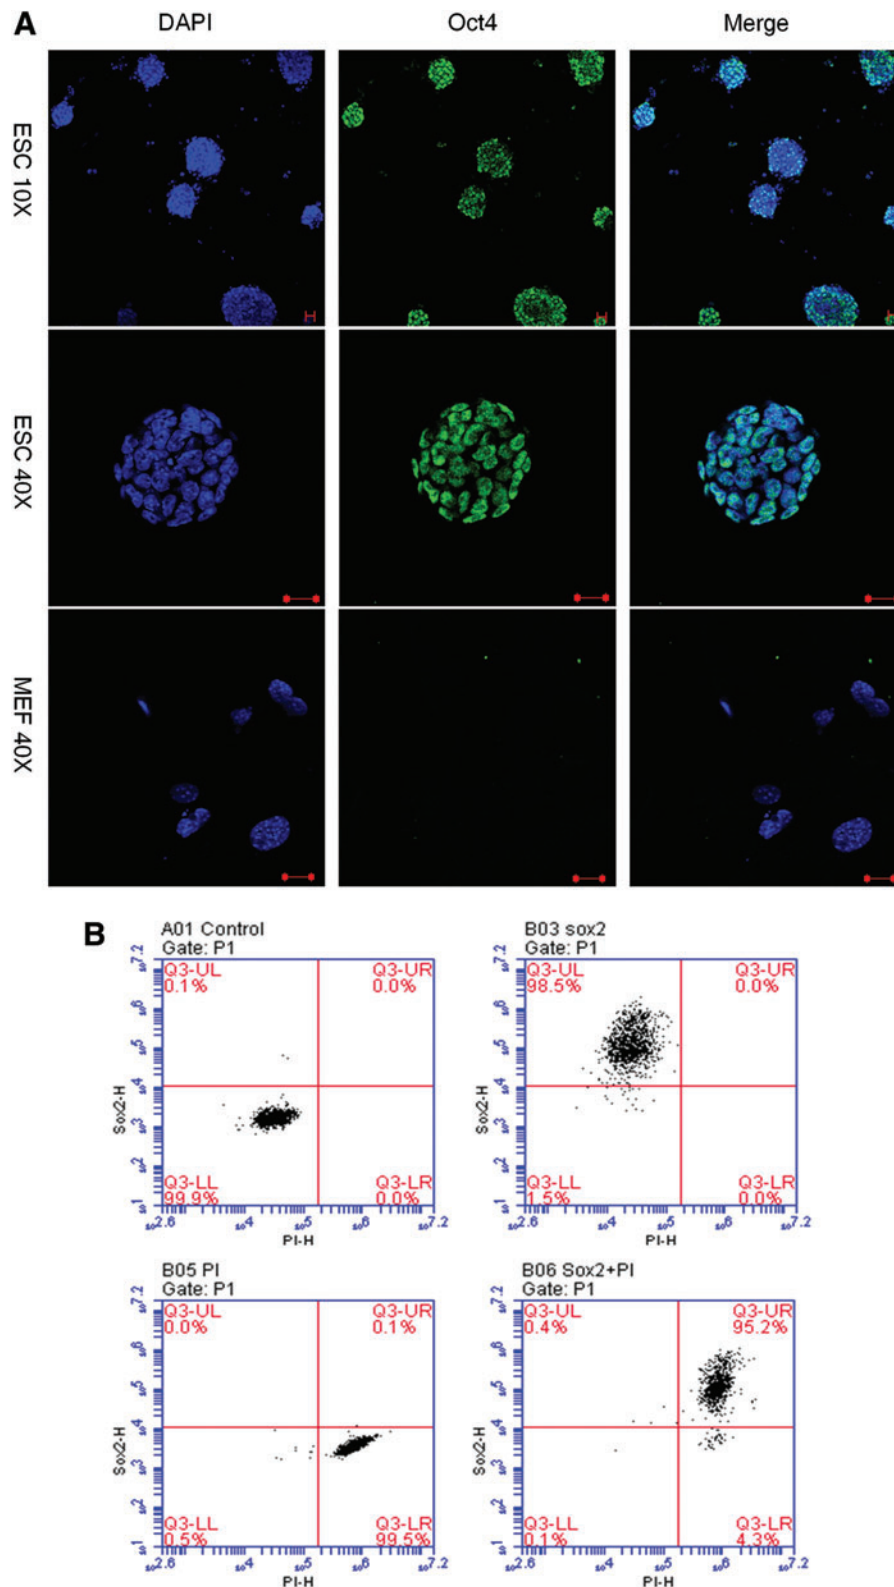

**SUPPLEMENTARY FIG. S1.** The level of pluripotency markers in R1 mouse ESCs. **(A)** Colocalization of Oct4 and DAPI in ES cells detected by immunofluorescence staining confocal imaging assay. DAPI represents the cell nucleus position; Oct4 is a pluripotent marker. Scale bar: 20  $\mu$ m. **(B)** Quantification of Sox2-positive ES cells by flow cytometric analysis. ES cells stained with buffer control (left upper panel), PI alone (left bottom panel), pluripotent marker sox2 alone (right upper panel), and dual-stained with PI and Sox2 (right bottom panel). PI, propidium iodide; ESC, embryonic stem cell; MEF, mouse embryonic fibroblast.
