# Supplementary material
Source: PubMed Central journal article supplement (PMC3822375)
Supplement: Supp_Fig2.pdf [file Supp_Fig2.pdf]

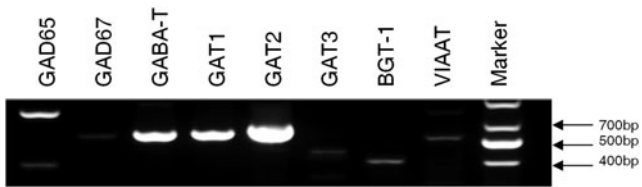

**SUPPLEMENTARY FIG. S2.** Expression of GABAergic transmission output and reuptake/termination components in S6 ESCs. RT-PCR analysis of GABA synthesis enzymes GAD65 and GAD67, vesicular transporter VIAAT, cell membrane transporters GAT1, GAT2, GAT3, and BGT1, and degradation enzyme GABA-T of S6 ES cells. GABA,  $\gamma$ -aminobutyric acid; GAD, glutamic acid decarboxylase; VIAAT, vesicular inhibitory amino acid transporter; RT-PCR, reverse transcriptase-polymerase chain reaction.
