# Supplementary material
Source: PubMed Central journal article supplement (PMC3822375)
Supplement: Supp_Fig3.pdf [file Supp_Fig3.pdf]

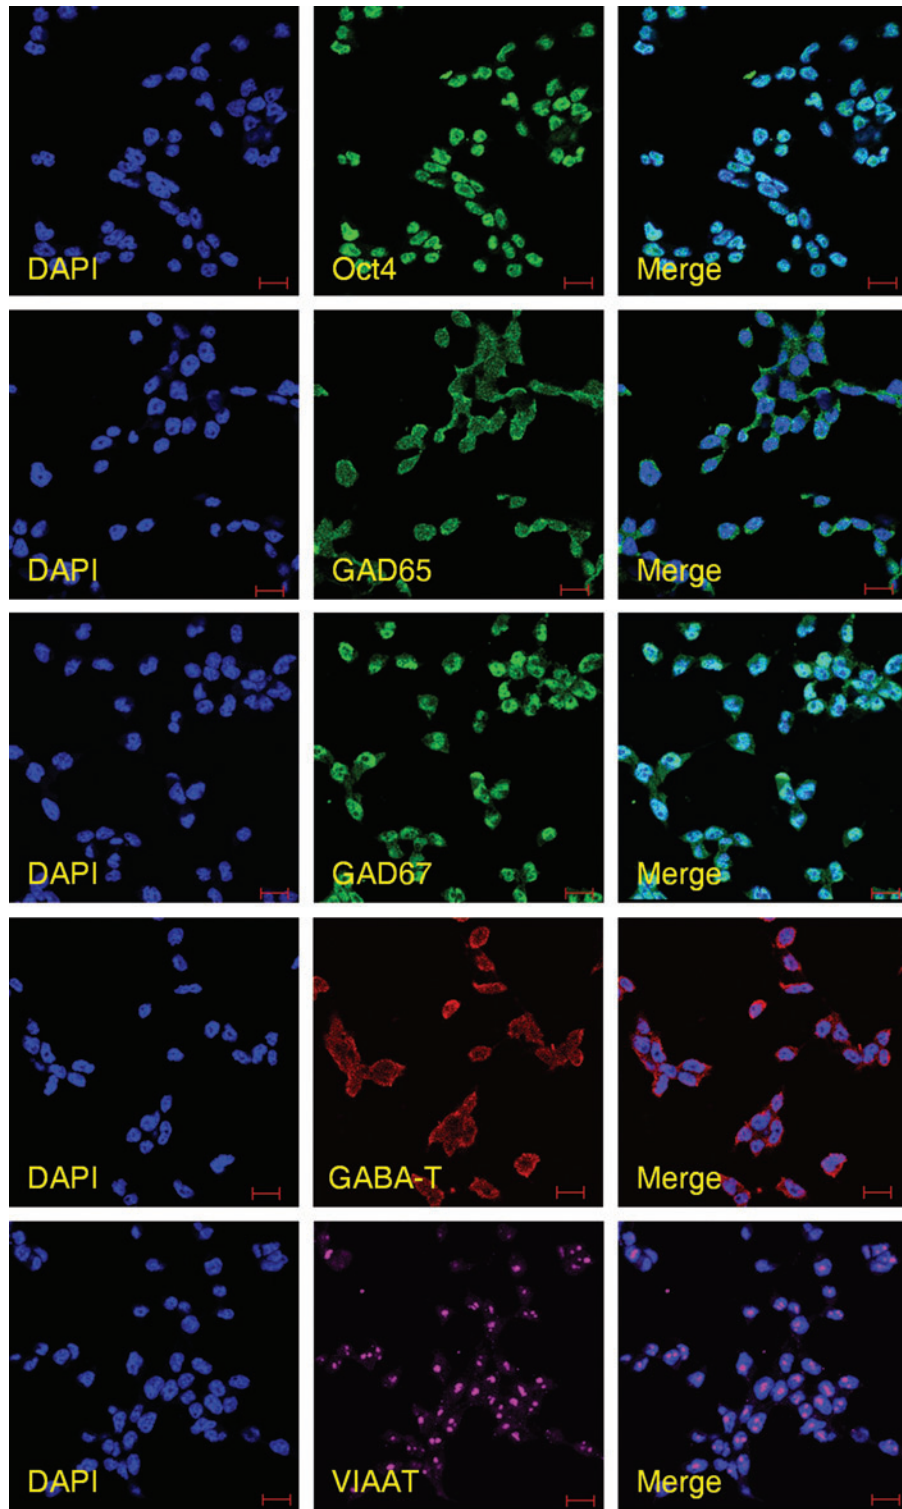

**SUPPLEMENTARY FIG. S3.** Representative immunofluorescence staining analysis of Oct4, GAD65, GAD67, GABA-T, and VIAAT of embryonic carcinoma stem cells. DAPI represents the cell nucleus position; Oct4 is a pluripotent marker; GAD67 and GAD65 are the two isoforms of the GABA synthesis enzyme. Scale bar: 20  $\mu\text{m}$ .
