# Supplementary material
Source: PubMed Central journal article supplement (PMC3822375)
Supplement: Supp_Table1.pdf [file Supp_Table1.pdf]

SUPPLEMENTARY TABLE S1. THE PRIMER SEQUENCES FOR  $\gamma$ -AMINO BUTYRIC ACID RECEPTOR SUBUNITS/SUBTYPES

| Receptor subunit/subtype | Gene             | Primer sequences (5'-3') | Fragment (bp) |
|--------------------------|------------------|--------------------------|---------------|
| $\alpha$ 1               | <i>Gabra1_F1</i> | tgctaataagctcctgcgta     | 362           |
|                          | <i>Gabra1_R1</i> | gcacggcagatatgttgaat     |               |
| $\alpha$ 2               | <i>Gabra2_F1</i> | ttacagtccaagccgaatgtc    | 422           |
|                          | <i>Gabra2_R1</i> | agcactgatgctcaaggtgtg    |               |
| $\alpha$ 3               | <i>Gabra3_F1</i> | ggtagataatgggaccctcctc   | 377           |
|                          | <i>Gabra3_R1</i> | gccagaaagacactgtgacag    |               |
| $\alpha$ 4               | <i>Gabra4_F1</i> | cggtcttattgagttgctg      | 599           |
|                          | <i>Gabra4_R1</i> | aaatgctcctcaatgtgactgg   |               |
| $\alpha$ 5               | <i>Gabra5_F1</i> | caatgacgcttgaggactttc    | 366           |
|                          | <i>Gabra5_R1</i> | Tggtcactccaaaaactgtcc    |               |
| $\alpha$ 6               | <i>Gabra6_F1</i> | tccactcaagttgggagcta     | 502           |
|                          | <i>Gabra6_R1</i> | ccttcagccttctgtgactg     |               |
| $\beta$ 1                | <i>Gabrb1_F1</i> | tcacatgtattccagcagtc     | 510           |
|                          | <i>Gabrb1_R1</i> | aaggcatgtaggctgcaaaat    |               |
| $\beta$ 2                | <i>Gabrb2_F1</i> | cagaacctaaaggatgtggag    | 481           |
|                          | <i>Gabrb2_R1</i> | gtgtgattctgaggccatata    |               |
| $\beta$ 3                | <i>Gabrb3_F1</i> | tggaacctcagaagataccact   | 326           |
|                          | <i>Gabrb3_R1</i> | tgcatcgtaattgatccagaag   |               |
| $\gamma$ 1               | <i>Gabrg1_F1</i> | gtccagatataggcgtgagacc   | 630           |
|                          | <i>Gabrg1_R1</i> | cccaggaaagaaccactgttag   |               |
| $\gamma$ 2               | <i>Gabrg2_F1</i> | gcttcacaagccaaaagtcatg   | 330           |
|                          | <i>Gabrg2_R1</i> | agattttccccacatattgc     |               |
| $\gamma$ 3               | <i>Gabrg3_F1</i> | ccctgcatactgactgtggtt    | 316           |
|                          | <i>Gabrg3_R1</i> | ttcgatcaggaatccatcttg    |               |
| $\Delta$                 | <i>Gabrd_F1</i>  | ttttatacagcatccgcatcac   | 674           |
|                          | <i>Gabrd_R1</i>  | gatagccaactcctgactgacc   |               |
| $\Theta$                 | <i>Gabre_F1</i>  | ttgacatcatcttccaccagac   | 344           |
|                          | <i>Gabre_R1</i>  | gagcttgaaattctccatttg    |               |
| $\Theta$                 | <i>Gabrq_F1</i>  | cctgctgctcattaggacttg    | 559           |
|                          | <i>Gabrq_R1</i>  | cttgaggattgttgcctcat     |               |
| $\Pi$                    | <i>Gabrp_F1</i>  | ctgggtgccagacacttacat    | 498           |
|                          | <i>Gabrp_R1</i>  | gtgtcactccaatgcagggt     |               |
| $\rho$ 1                 | <i>Gabbr1_F1</i> | cgagtgtctacatcaagctg     | 347           |
|                          | <i>Gabbr1_R1</i> | gtgttgatcctcatgctcacat   |               |
| $\rho$ 2                 | <i>Gabbr2_F1</i> | tctcctgtccagtttctgat     | 491           |
|                          | <i>Gabbr2_R1</i> | ggcctcagattcactgtagctt   |               |
| $\rho$ 3                 | <i>Gabbr3_F1</i> | tctcctcacctacacctggat    | 306           |
|                          | <i>Gabbr3_R1</i> | agtgcctgaggtaaaccgtcat   |               |
| B1                       | <i>Gabbr1_F1</i> | ggctactacgacagcaccag     | 325           |
|                          | <i>Gabbr1_R1</i> | actggcttccctatgtgggt     |               |
| B2                       | <i>Gabbr2_F1</i> | ccaagctcatcactctgagg     | 327           |
|                          | <i>Gabbr2_R1</i> | tcctcatctgtctctctgt      |               |

GABA,  $\gamma$ -aminobutyric acid.
