# Supplementary material
Source: PubMed Central journal article supplement (PMC3822375)
Supplement: Supp_Table2.pdf [file Supp_Table2.pdf]

SUPPLEMENTARY TABLE S2. THE PRIMER SEQUENCES FOR GABAergic TRANSMISSION OUTPUT AND REUPTAKE/TERMINATION COMPONENTS

| <i>GABAergic transmission components</i> | <i>Gene</i>                         | <i>Primer sequences (5'-3')</i> | <i>Fragment (bp)</i> |
|------------------------------------------|-------------------------------------|---------------------------------|----------------------|
| <i>GAD65</i>                             | <i>GAD65_F1</i>                     | attacccaatgagcttcttca           | 592                  |
|                                          | <i>GAD65_R1</i>                     | ctcaccaggaaaggaacaaatc          |                      |
| <i>GAD67</i>                             | <i>GAD67_F1</i>                     | ttagcagcagactggttgacat          | 428                  |
|                                          | <i>GAD67_R1</i>                     | ctcaccaggaaaggaacaaatc          |                      |
| <i>VIAAT</i>                             | <i>VIAAT_F1</i>                     | cgtcgaggagacattcattat           | 620                  |
|                                          | <i>VIAAT_R1</i>                     | agtaagcgatgaccaggatggt          |                      |
| <i>GAT1</i>                              | <i>GAT1_F1</i>                      | gccttcctaattccatatttc           | 484                  |
|                                          | <i>GAT1_R1</i>                      | agtagaccacctttccagtcca          |                      |
| <i>GAT2</i>                              | <i>GAT2_F1</i>                      | gctgatcctcgctatctctgtt          | 345                  |
|                                          | <i>GAT2_R1</i>                      | atggagtatccccaagaaggat          |                      |
| <i>GAT3</i>                              | <i>GAT3_F1</i>                      | catctgctacttctgcatctgg          | 634                  |
|                                          | <i>GAT3_R1</i>                      | gaacgagatgacggacacaata          |                      |
| <i>BGT1</i>                              | <i>BGT1_F1</i>                      | ctgagaactttacctgcctgt           | 418                  |
|                                          | <i>BGT1_R1</i>                      | atggagtcctgtagcagttgt           |                      |
| <i>GABA-T</i>                            | <i>GABA-T_F1</i>                    | gcatgttgacctgtattctca           | 451                  |
|                                          | <i>GABA-T_R1</i>                    | tcaaaggaaggatgtcaatct           |                      |
| $\beta$ actin                            | <i><math>\beta</math> actin _F1</i> | atatcgtcgcgtggtcgtc             | 517                  |
|                                          | <i><math>\beta</math> actin _R1</i> | aggatggcgtgaggagagac            |                      |

GAD, glutamic acid decarboxylase; VIAAT, vesicular inhibitory amino acid transporter.
